# Supplementary material for: Borane-catalysed dinitrogen borylation by 1,3-B–H bond addition
Source: Royal Society of Chemistry journal article supplement (doi:10.1039/d1dt00317h), 2021-01-01
Supplement: d1dt00317h1.pdf [file d1dt00317h1.pdf]

*Electronic Supplementary Information for*

**Borane-Catalysed Dinitrogen Borylation by 1,3-B–H Bond Addition**

Anaïs Coffinet, Dan Zhang, Laure Vendier, Sébastien Bontemps and Antoine Simonneau\*

*LCC-CNRS, Université de Toulouse, CNRS, UPS, 205 route de Narbonne, BP44099, F-31077 Toulouse cedex 4, France.*

*E-mail: antoine.simonneau@lcc-toulouse.fr*

## Table of Contents

|                                                                                                    |           |
|----------------------------------------------------------------------------------------------------|-----------|
| <b>1. Characterization Data of New Compounds .....</b>                                             | <b>2</b>  |
| 1.1. Generation of tricyclohexyldiborane .....                                                     | 2         |
| 1.2. Compound <b>7</b> .....                                                                       | 3         |
| 1.3. Generation of triisopinocampheylidiborane.....                                                | 5         |
| 1.4. Compound <b>8</b> .....                                                                       | 6         |
| 1.5. Compound <b>9</b> in the reaction mixture .....                                               | 8         |
| 1.6. Compound <b>10</b> .....                                                                      | 10        |
| 1.7. Reaction between compound <b>9</b> and $\text{HB}(\text{C}_6\text{F}_5)_2$ ( <b>1</b> ) ..... | 13        |
| 1.8. Reaction between compound <b>3</b> and 9-BBN .....                                            | 14        |
| 1.9. Reaction between compound <b>10</b> and Lewis bases.....                                      | 14        |
| 1.10. Reaction between 9-BBN and $\text{HB}(\text{C}_6\text{F}_5)_2$ ( <b>1</b> ) .....            | 15        |
| 1.11. Compound <b>11</b> .....                                                                     | 16        |
| 1.12. Formation of complex <b>9</b> with HBcat as a catalyst .....                                 | 18        |
| <b>2. Crystallography.....</b>                                                                     | <b>19</b> |
| 2.1. Data Collection and Refinement .....                                                          | 19        |
| 2.2. X-ray Analysis of Compound <b>7</b> (CCDC ).....                                              | 20        |
| 2.3. X-ray Analysis of Compound <b>10</b> (CCDC ).....                                             | 21        |
| 2.4. X-ray Analysis of Compound <b>11</b> (CCDC ).....                                             | 22        |
| <b>3. References.....</b>                                                                          | <b>23</b> |

# 1. Characterization Data of New Compounds

## 1.1. Generation of tricyclohexyldiborane

HBCy<sub>2</sub> (13.8 mg, 77 μmol) was introduced in a flask in a glovebox and was partially dissolved in 0.5 mL of C<sub>6</sub>D<sub>6</sub>. The solution was then heated at 60 °C for 1 h to give a homogeneous solution that was subsequently analyzed by NMR.

<sup>11</sup>B NMR (128 MHz, C<sub>6</sub>D<sub>6</sub>) δ 81.9 (BCy<sub>3</sub>), 35.9 (Cy<sub>2</sub>BH<sub>2</sub>BHCy), 17.6 (Cy<sub>2</sub>BH<sub>2</sub>BHCy).

**Figure S1.** <sup>11</sup>B NMR spectrum (128.4 MHz, C<sub>6</sub>D<sub>6</sub>).

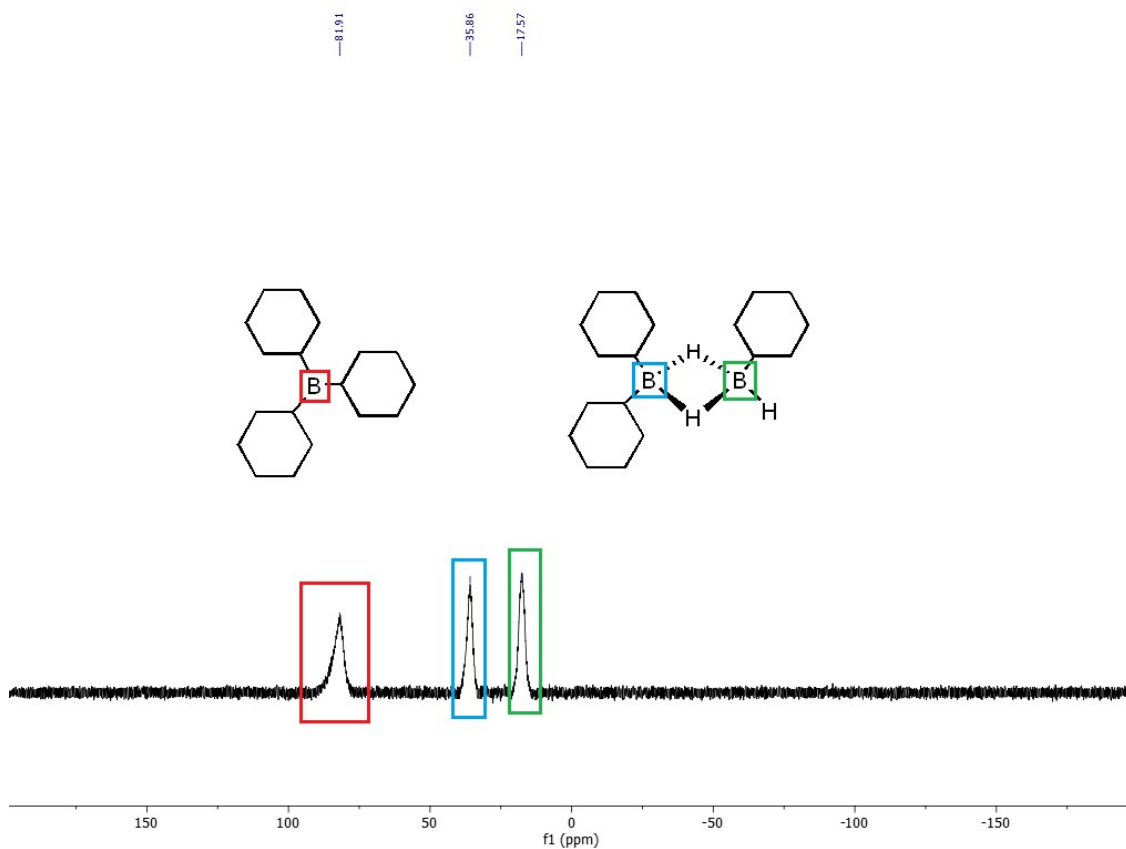

## 1.2. Compound 7

Figure S2.  $^1\text{H}$  NMR spectrum (400 MHz,  $\text{C}_6\text{D}_6$ )

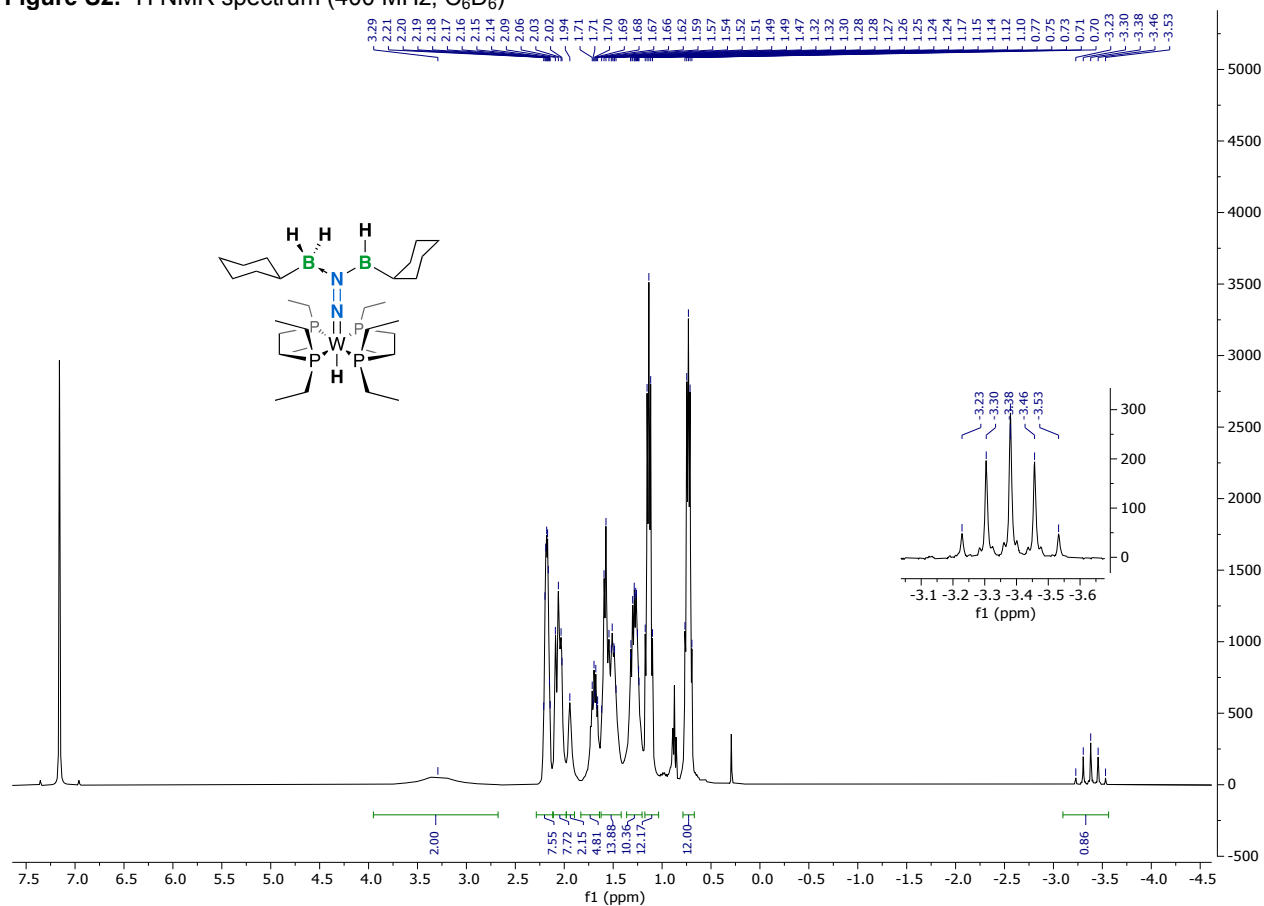

Figure S3.  $^{31}\text{P}\{^1\text{H}\}$  NMR spectrum (162 MHz,  $\text{C}_6\text{D}_6$ )

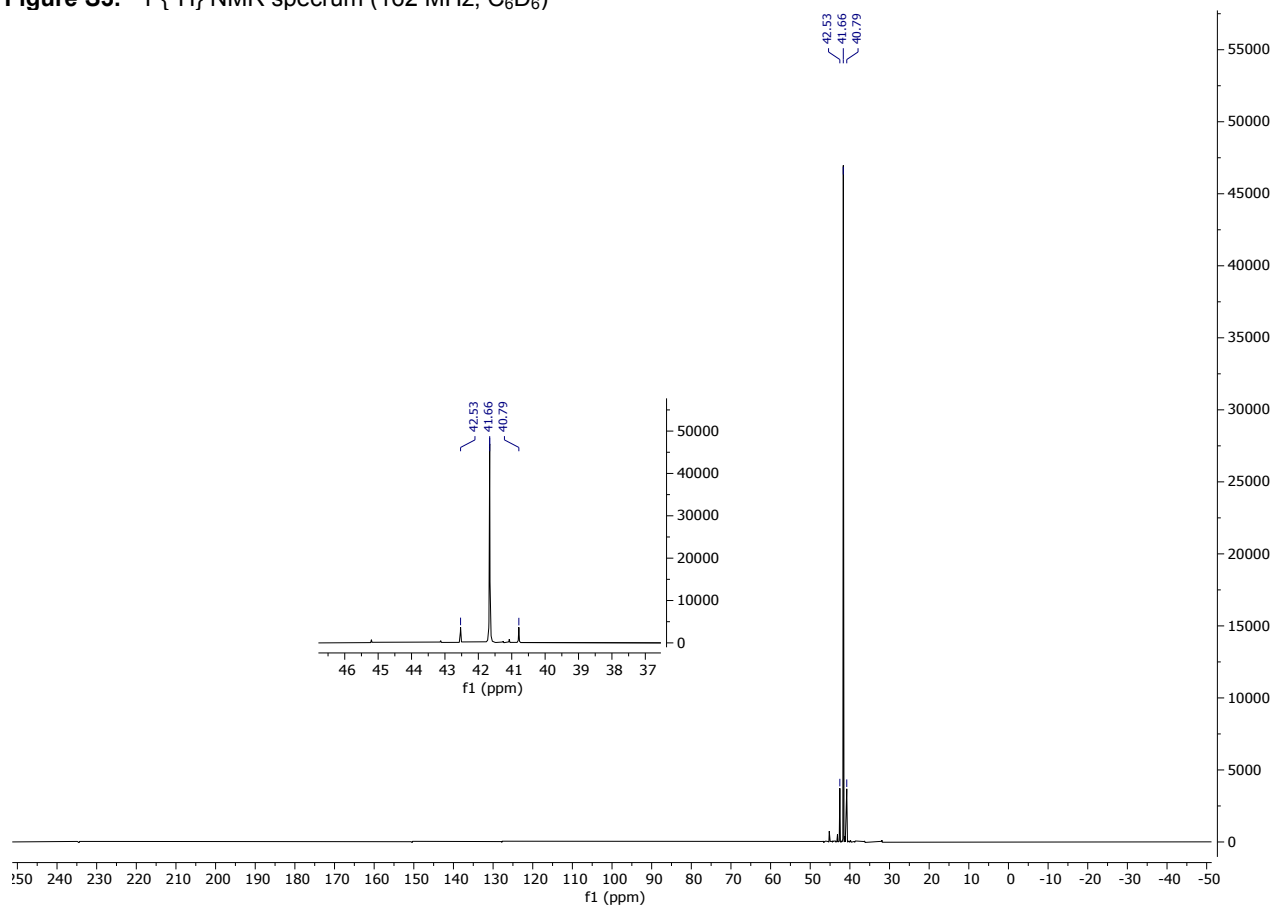

Figure S4.  $^{11}\text{B}$  NMR spectrum (128.4 MHz,  $\text{C}_6\text{D}_6$ )

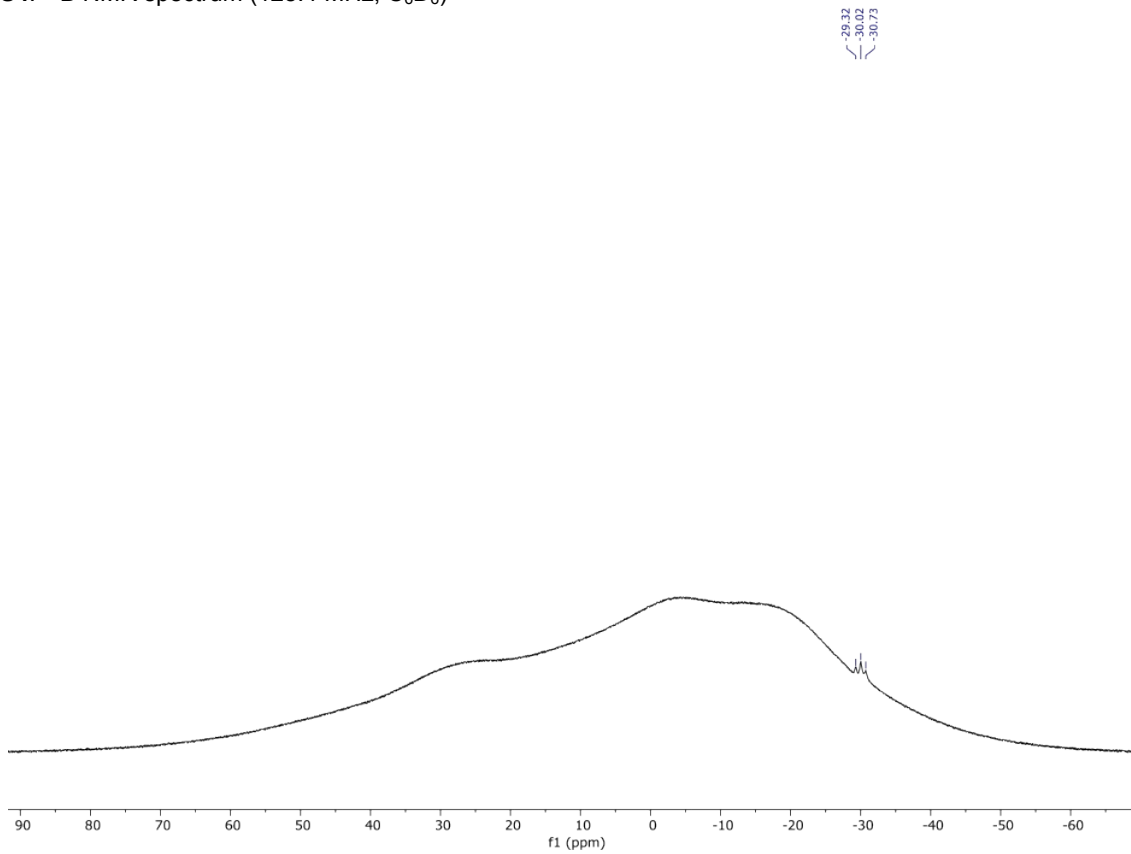

Figure S5. FT IR (ATR) spectrum.

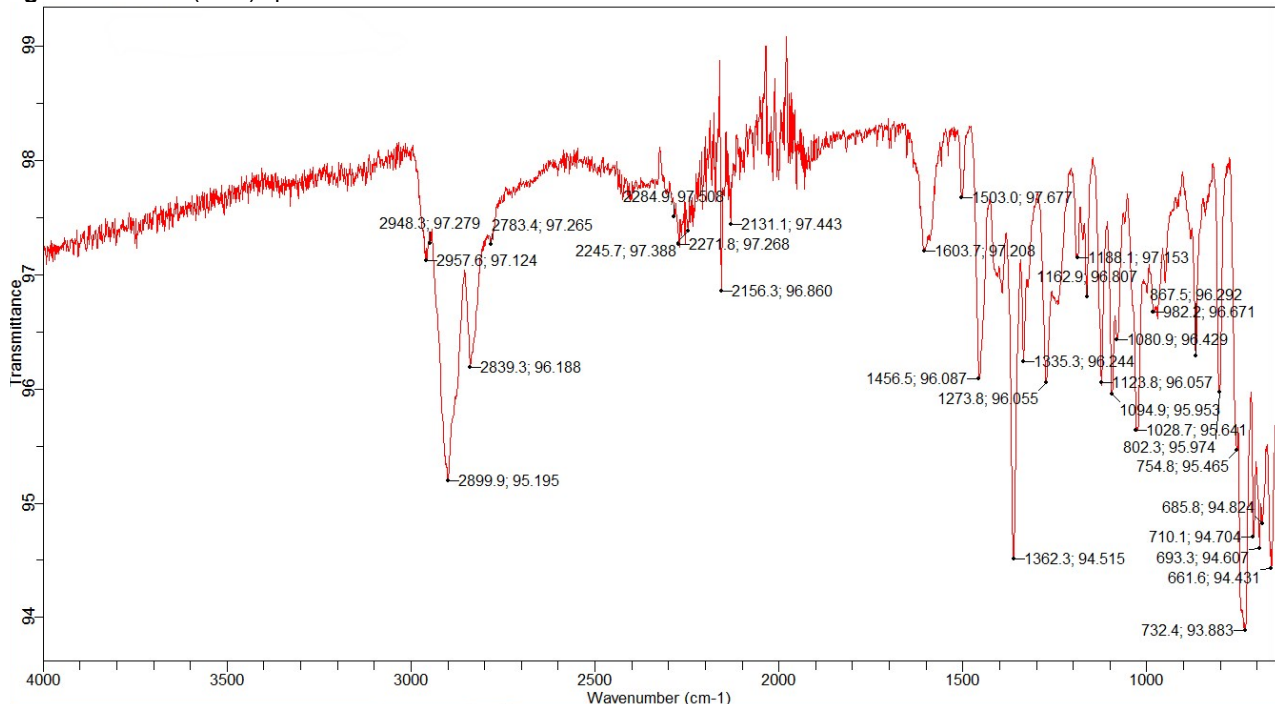

### 1.3. Generation of triisopinocampheylborane

HBIPC<sub>2</sub> (17.2 mg, 60 μmol) is introduced in a flask in a glovebox and is dissolved in 0.5 mL of C<sub>6</sub>D<sub>6</sub> giving a homogeneous solution that was subsequently analyzed by NMR.

**RMN <sup>11</sup>B** (128 MHz, C<sub>6</sub>D<sub>6</sub>) δ 37.5 (IPC<sub>2</sub>BH<sub>2</sub>BHIPC), 18.7 (IPC<sub>2</sub>BH<sub>2</sub>BHIPC).

**Figure S6.** <sup>11</sup>B NMR spectrum (128.4 MHz, C<sub>6</sub>D<sub>6</sub>) with exponential apodization and multiple point baseline correction.

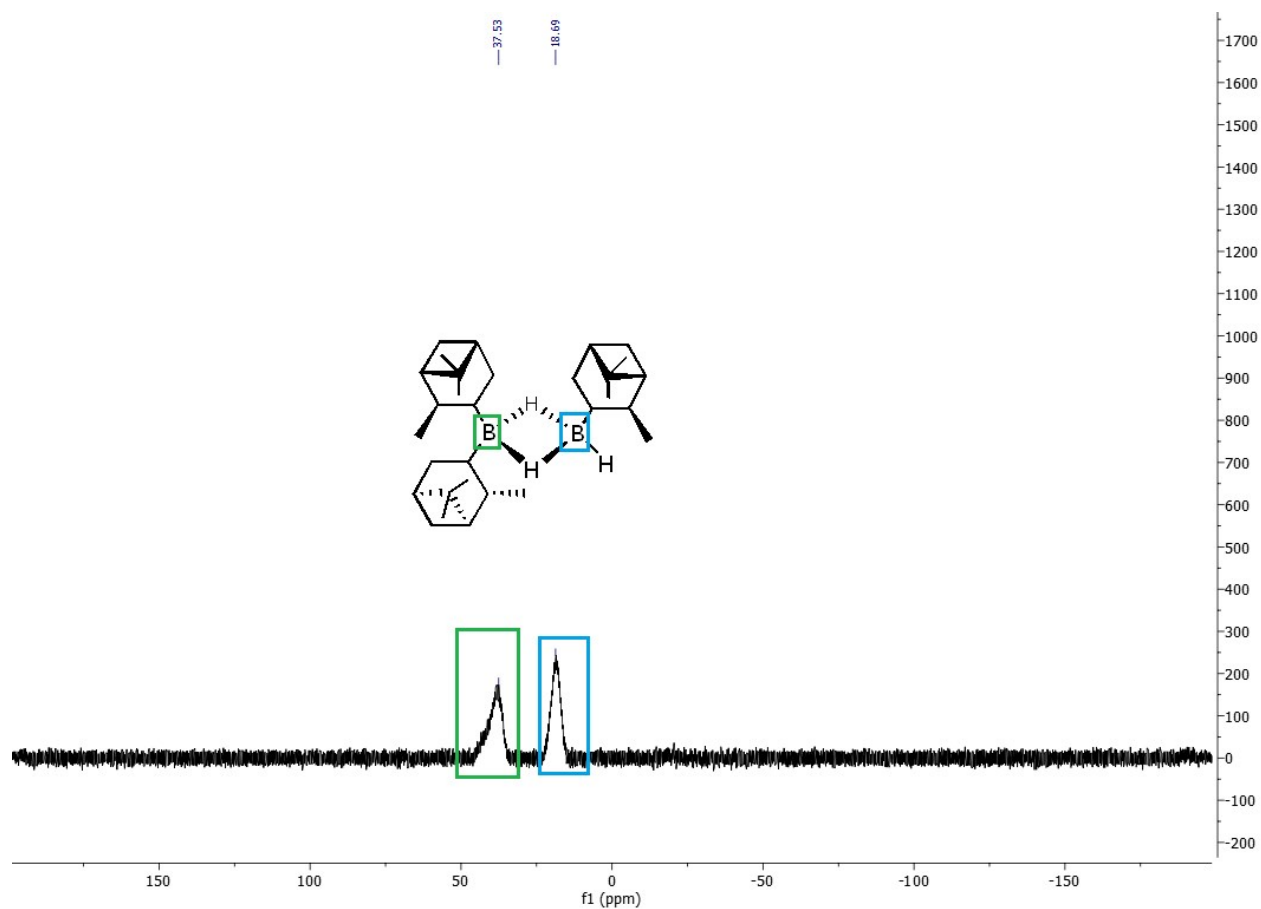

## 1.4. Compound 8

Figure S7.  $^1\text{H}$  NMR spectrum (400 MHz,  $\text{C}_6\text{D}_6$ )

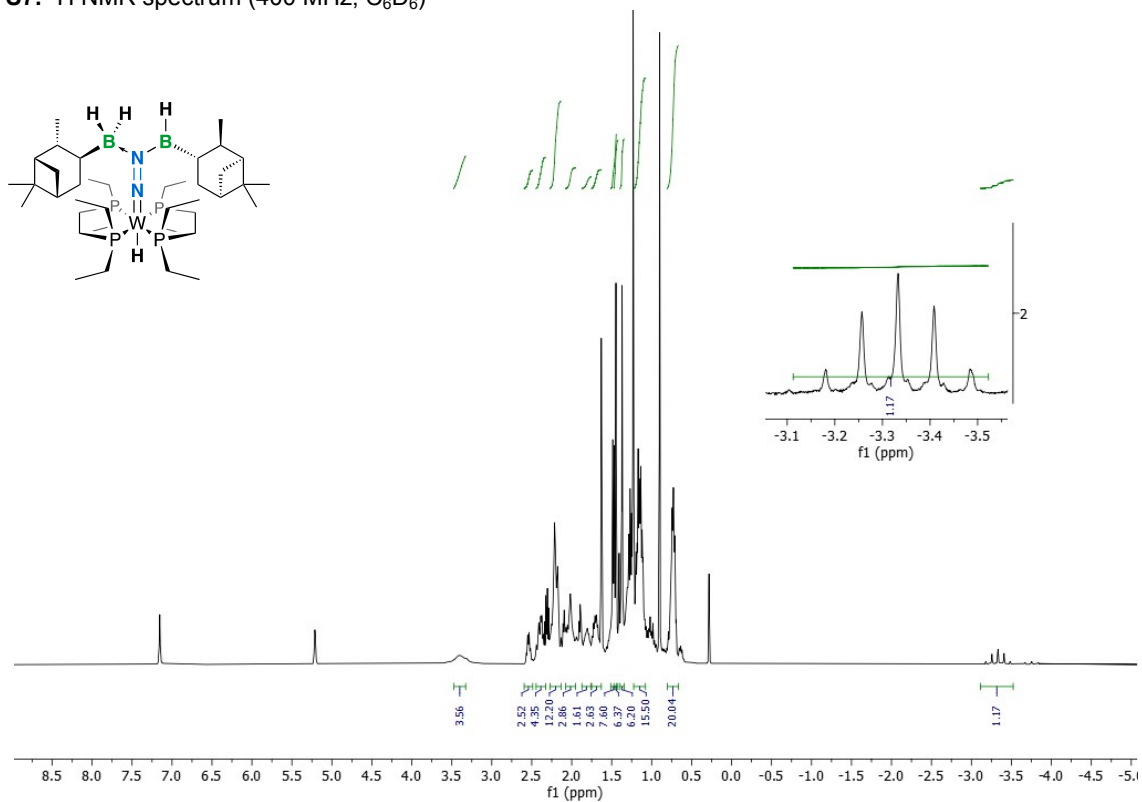

Figure S8.  $^{31}\text{P}$  NMR spectrum (162 MHz,  $\text{C}_6\text{D}_6$ )

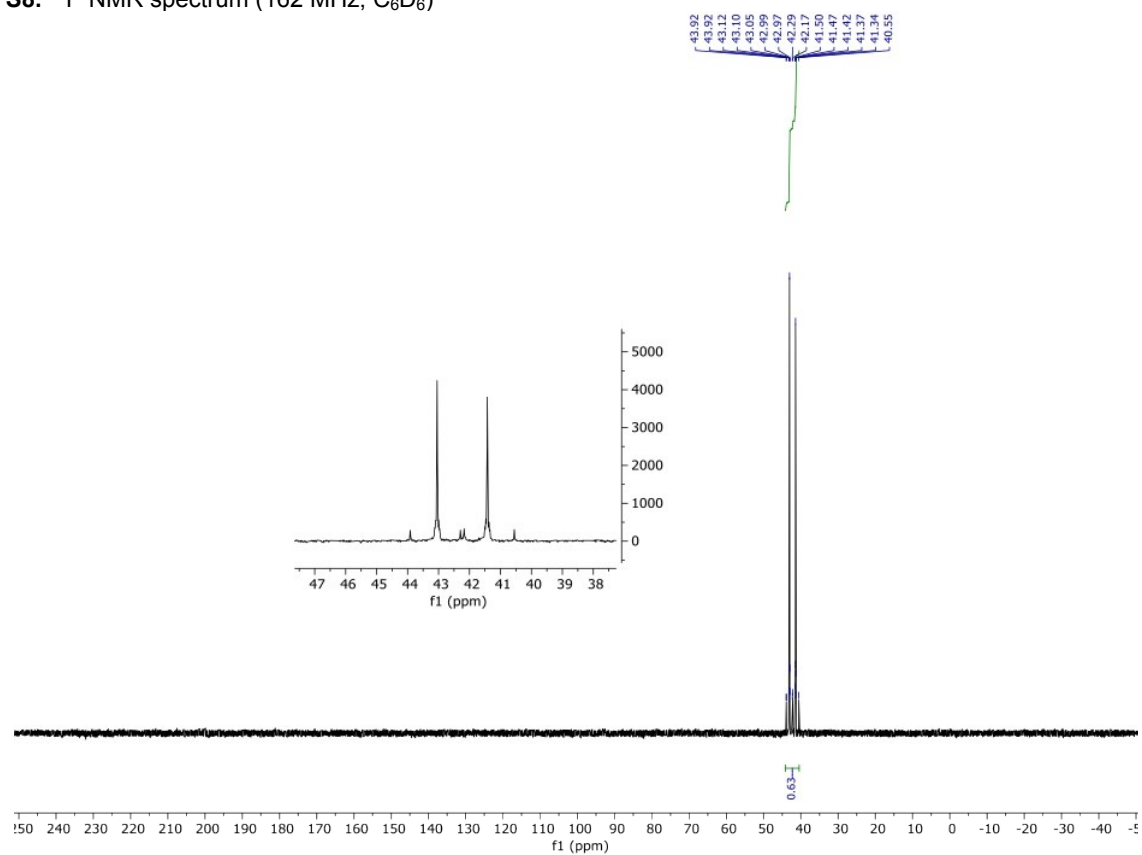

Figure S9.  $^{11}\text{B}$  NMR spectrum (128.4 MHz,  $\text{C}_6\text{D}_6$ )

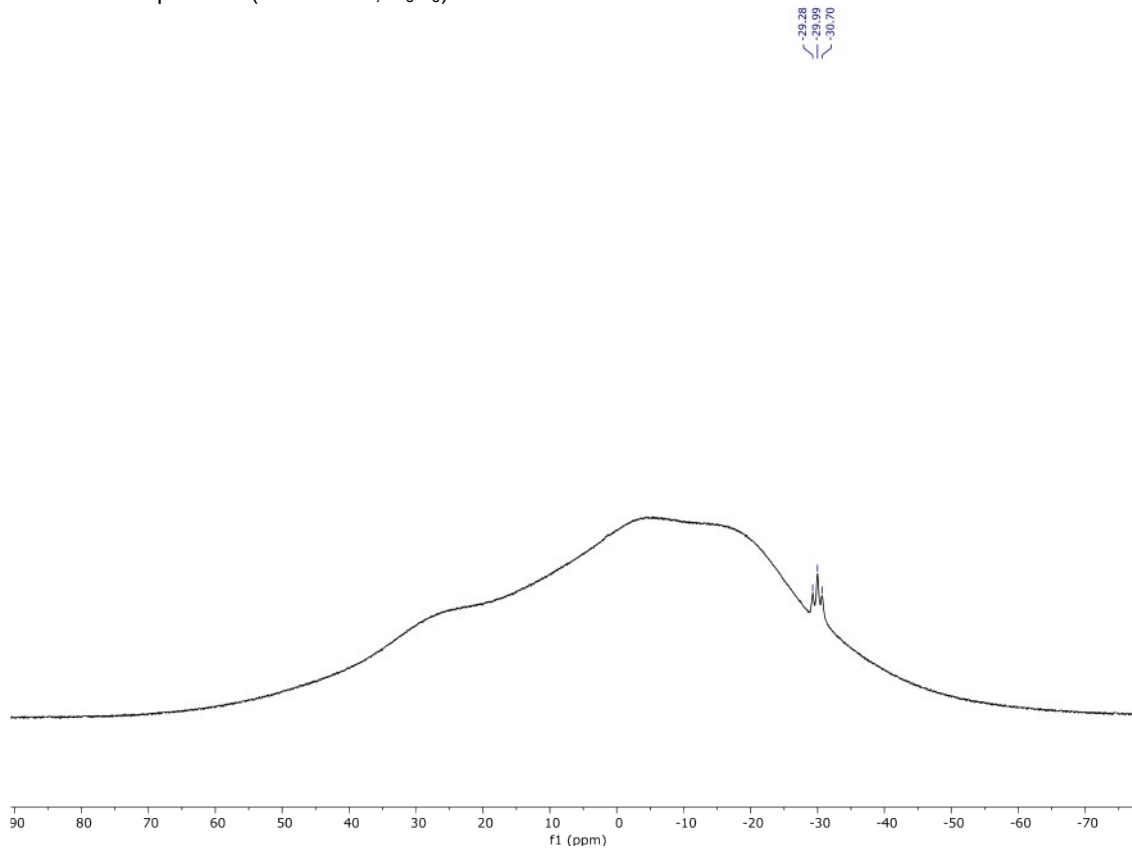

Fig. S10. FT IR (ATR) spectrum

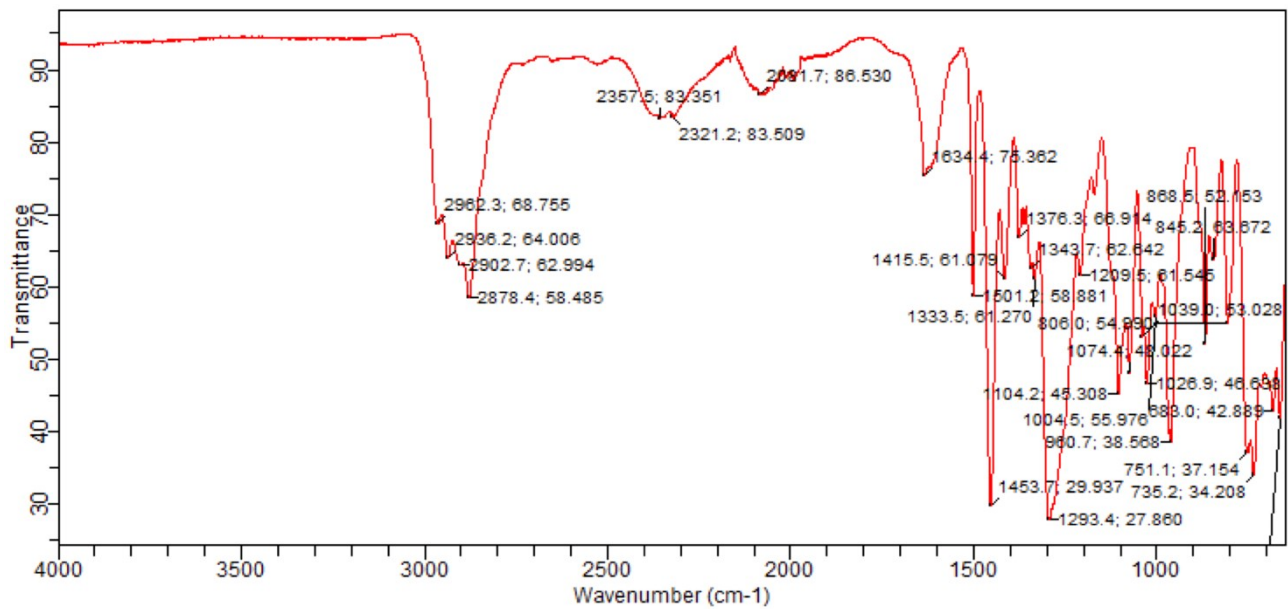



## 1.5. Compound **9** in the reaction mixture

**Figure S11.**  $^1\text{H}$  NMR spectrum (400 MHz,  $\text{C}_6\text{D}_6$ )

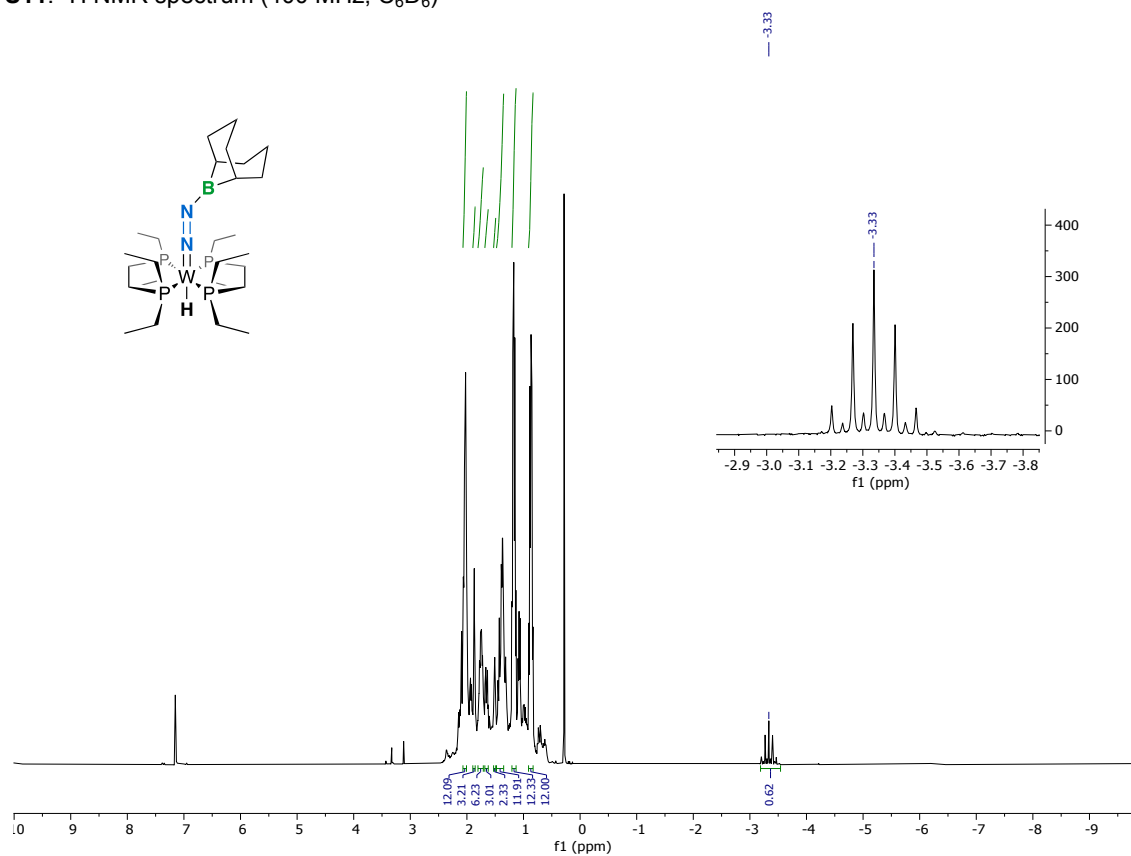

**Figure S12.**  $^{31}\text{P}\{^1\text{H}\}$  NMR spectrum (162 MHz,  $\text{C}_6\text{D}_6$ )

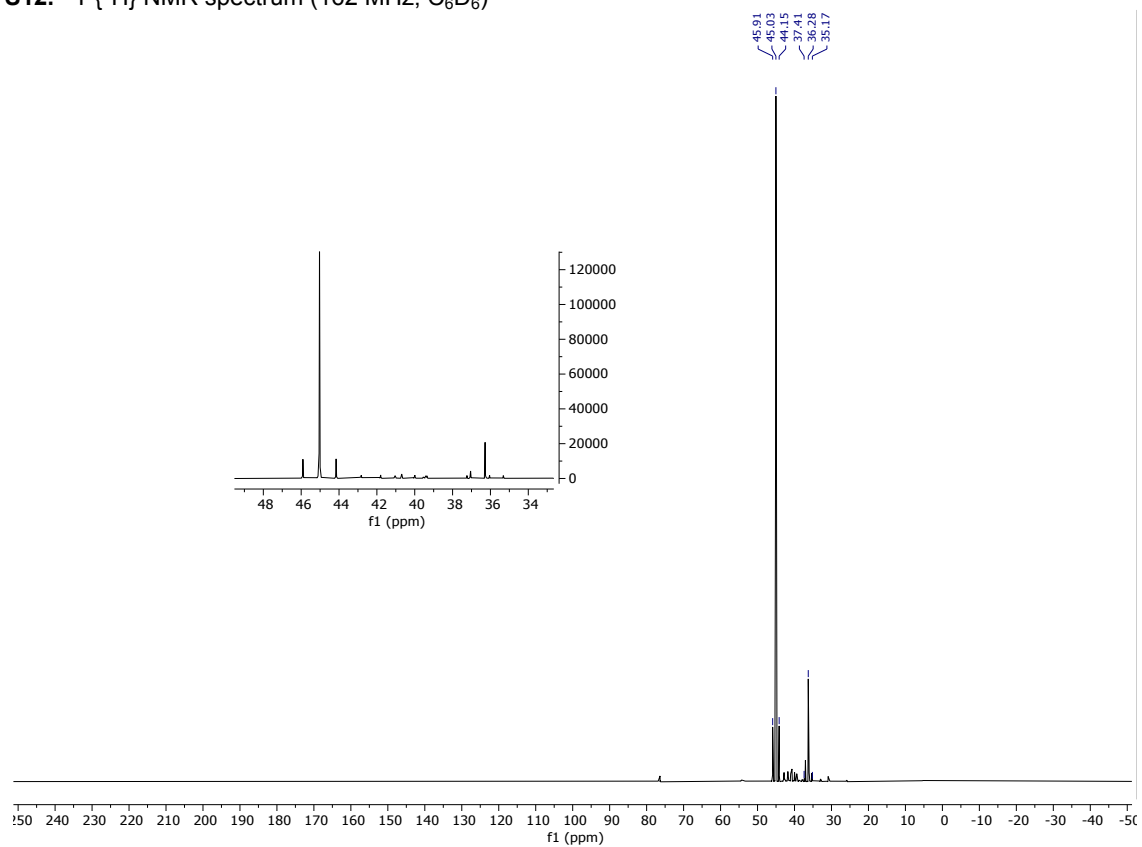

Figure S13.  $^{11}\text{B}$  NMR spectrum (128.4 MHz,  $\text{C}_6\text{D}_6$ )

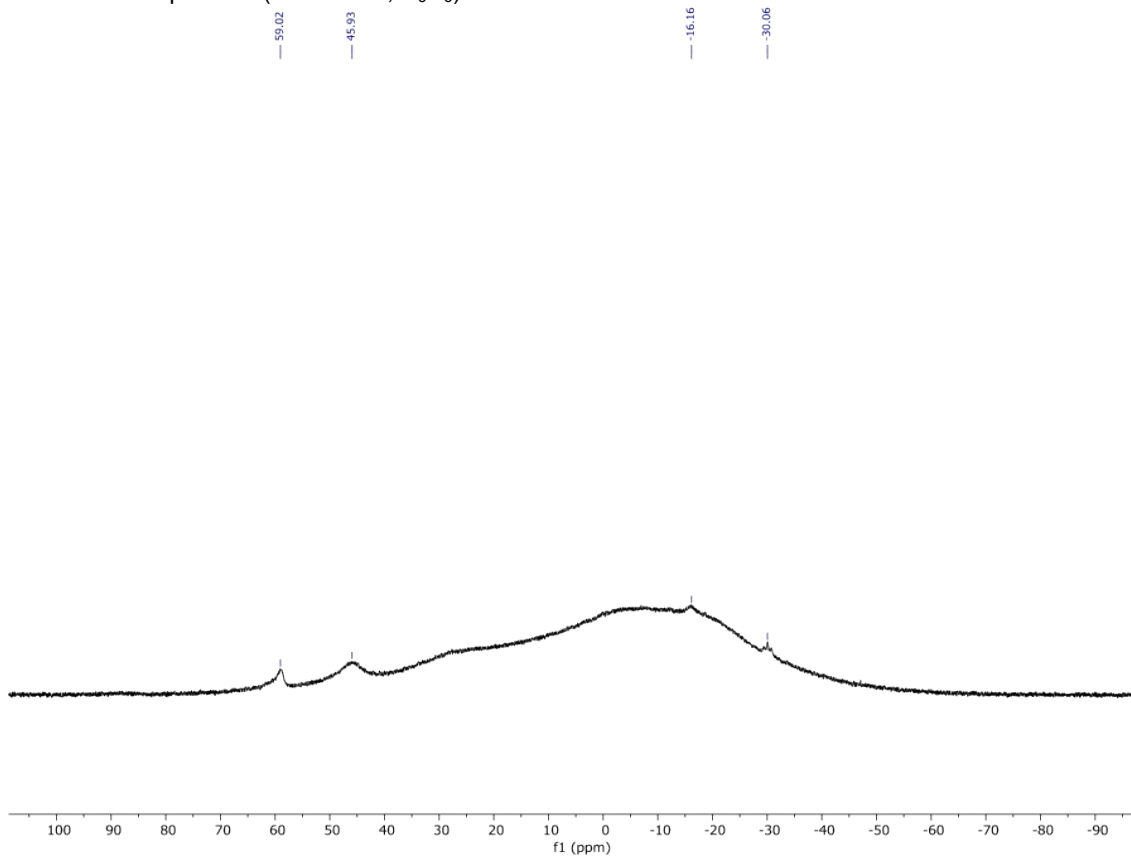

Figure S14.  $^{19}\text{F}$  NMR spectrum (377 MHz,  $\text{C}_6\text{D}_6$ )

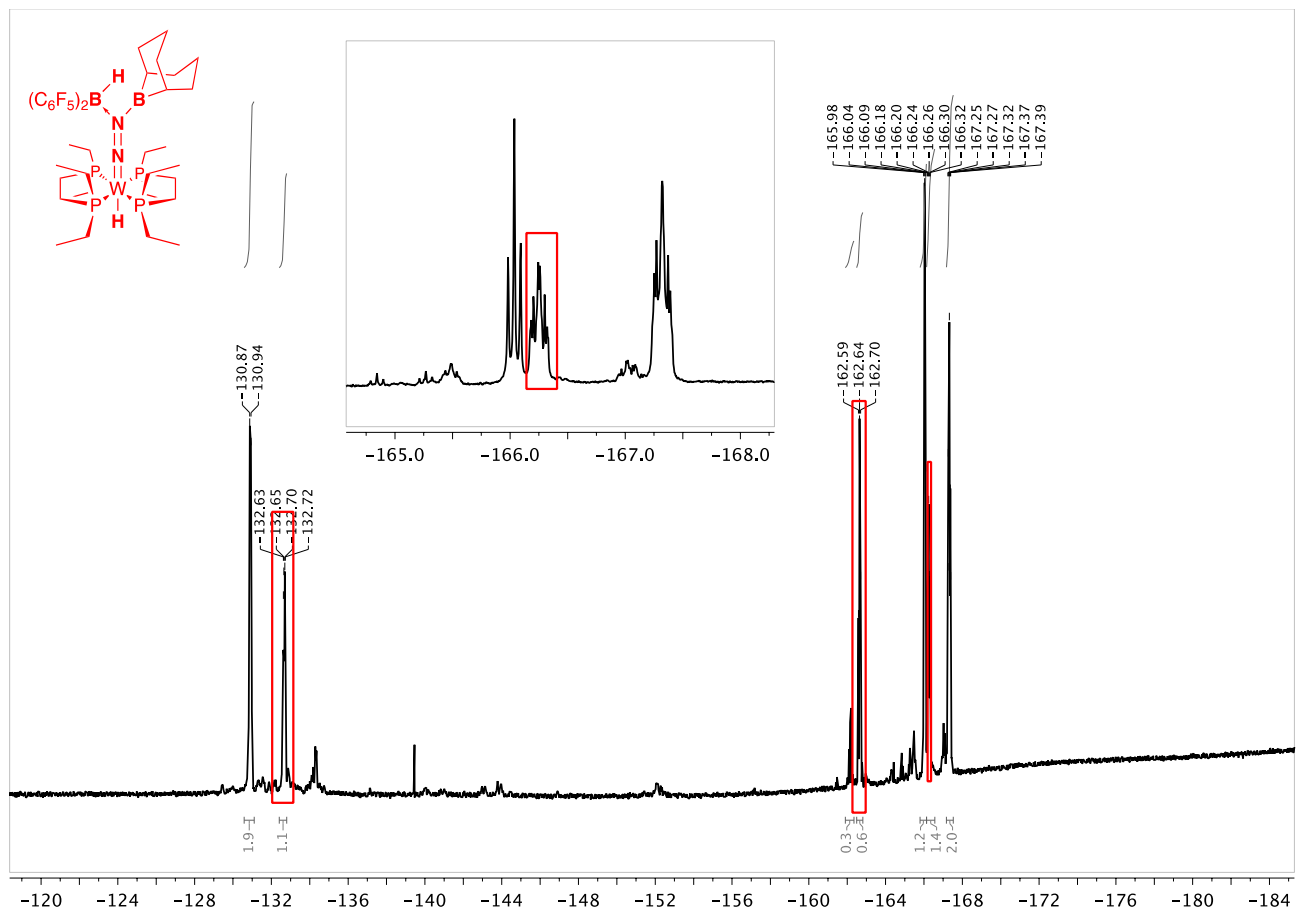

### Diffusion-ordered spectroscopy (DOSY)

This experiment was run on a Bruker Avance NEO 600, directly on the reaction mixture of **2**, 9-BBN and catalytic amounts of **1**. After 14 d of heating the C<sub>6</sub>D<sub>6</sub> solution, **2** and **9** are present in a ca. 25:75 mixture according to <sup>31</sup>P NMR integration. Diffusion coefficients are expressed in cm<sup>2</sup>·s<sup>-1</sup>. Gaussian fit to diffusion peak intensities gives a diffusion coefficient D of 5.07·10<sup>-6</sup> cm<sup>2</sup>·s<sup>-1</sup> for [W(depe)<sub>2</sub>(N<sub>2</sub>)<sub>2</sub>] (**2**) and 4.64·10<sup>-6</sup> cm<sup>2</sup>·s<sup>-1</sup> for **9**. Using the Stokes-Einstein equation, the Stokes radius of **2** and **9** were estimated to 6.1 and 6.7 Å, respectively. The closeness of these radii indeed suggests that **9** is monomeric in solution.

**Figure S15.** <sup>1</sup>H-DOSY NMR experiment (600 MHz, C<sub>6</sub>D<sub>6</sub>). On the vertical axis one read the diffusion units (cm<sup>2</sup>·s<sup>-1</sup>)

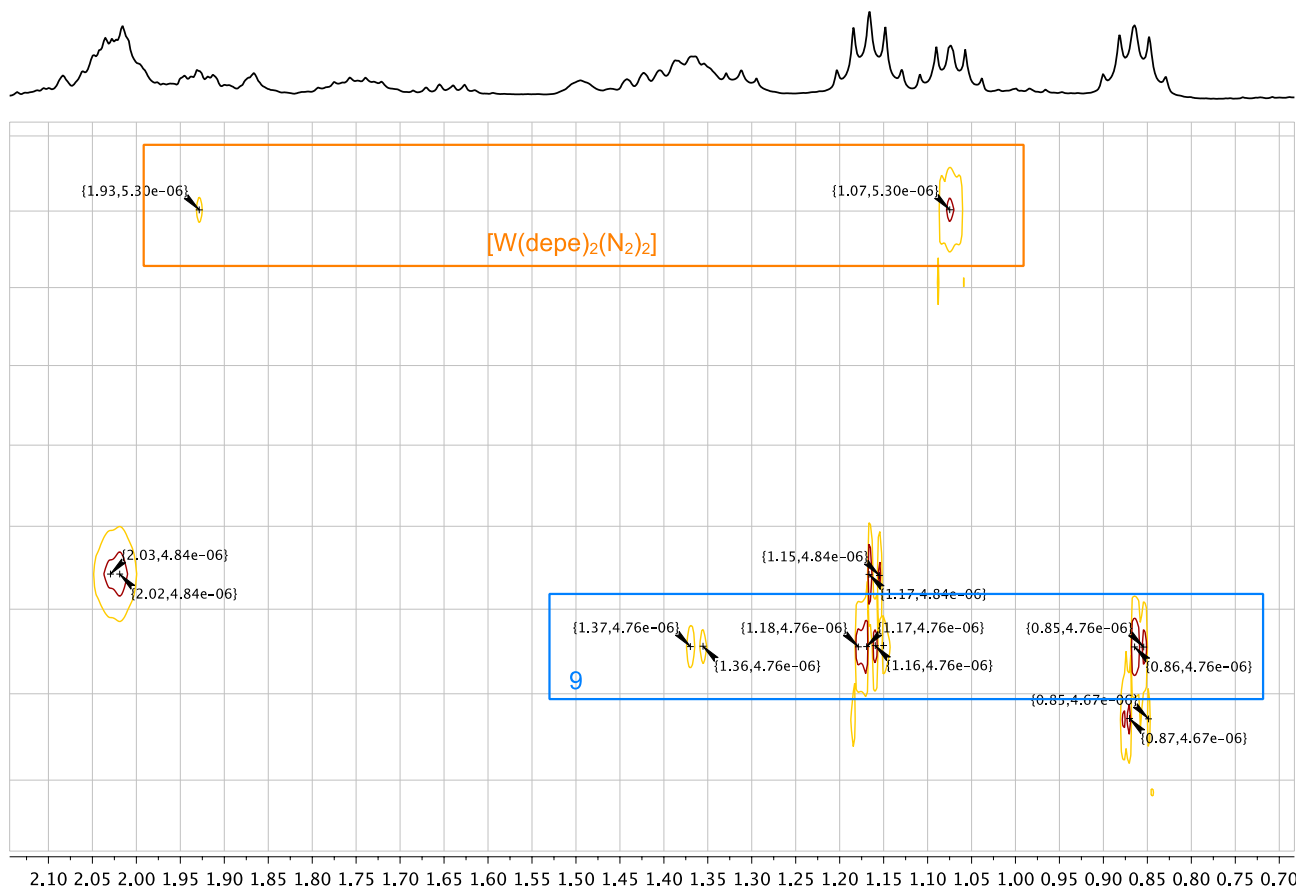



Figure S18.  $^{11}\text{B}$  NMR spectrum (128.4 MHz,  $\text{C}_6\text{D}_6$ )

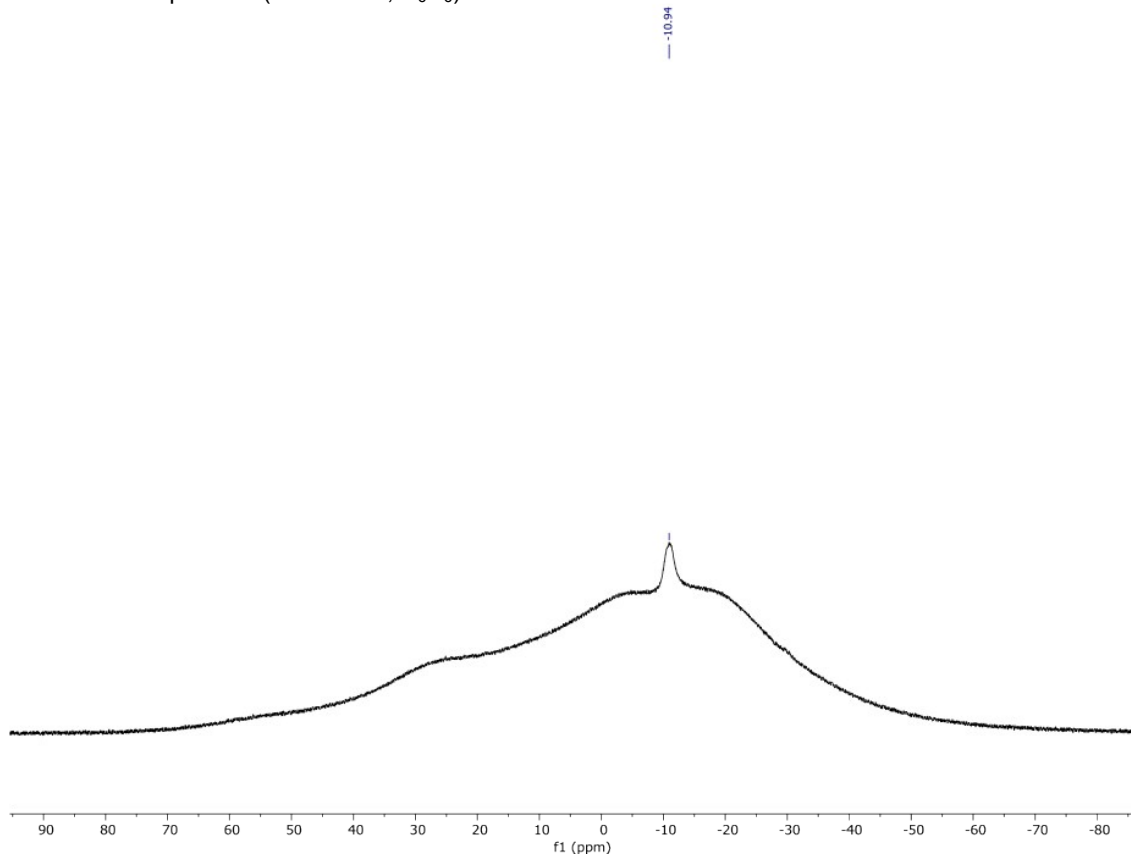

Figure S19.  $^{19}\text{F}$  NMR spectrum (377 MHz,  $\text{C}_6\text{D}_6$ )

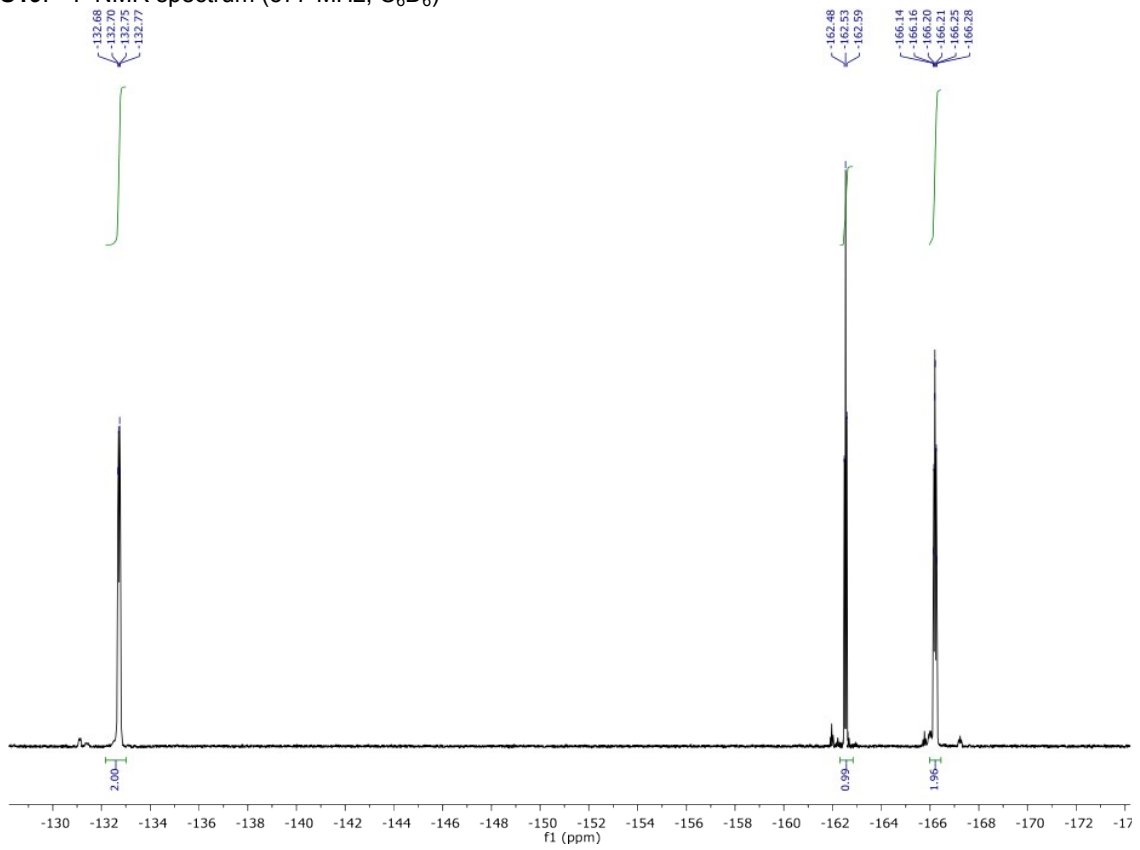

Figure S20. FT IR (ATR) spectrum

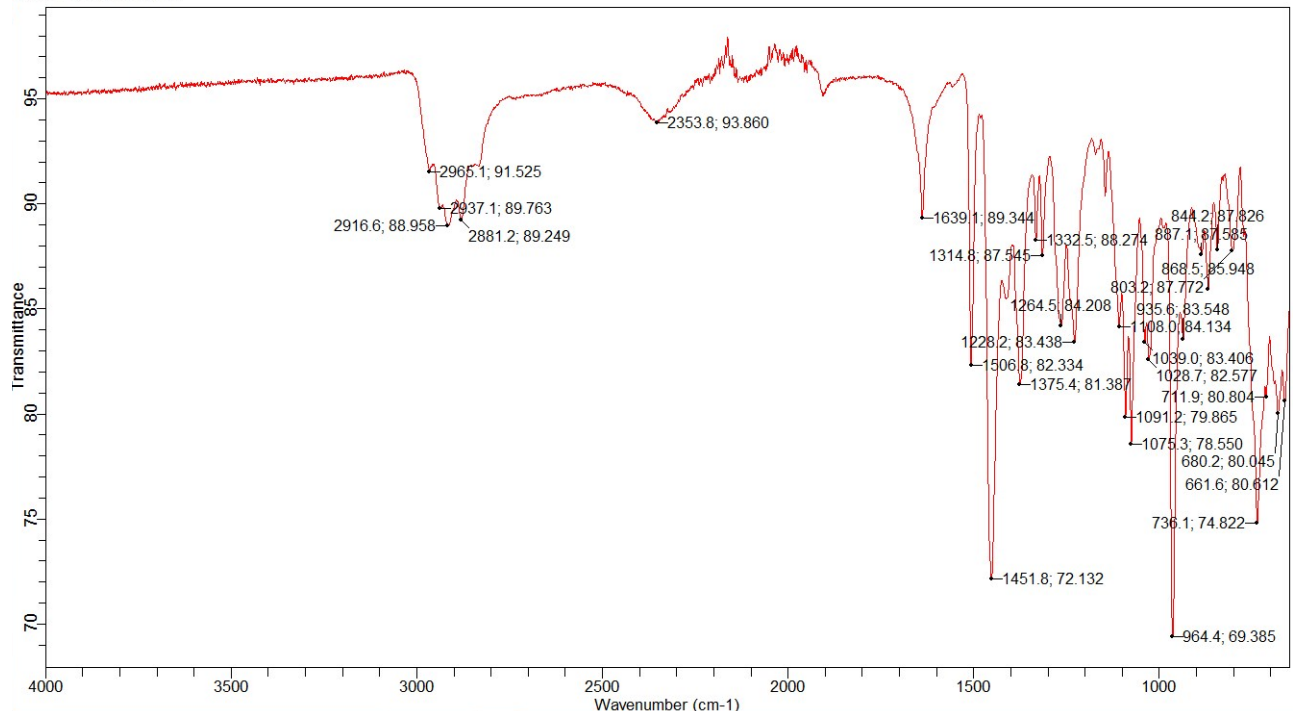

### 1.7. Reaction between compound **9** and $\text{HB}(\text{C}_6\text{F}_5)_2$ (**1**)

Compound **9** was formed *in-situ* and then  $\text{HB}(\text{C}_6\text{F}_5)_2$  (**1**) was added. We monitored the reaction by NMR spectroscopy. Four different products were observed during the reaction leading mainly to the formation of compound **10**.

**Figure S21.** Stacked  $^{31}\text{P}$  NMR spectra (162 MHz,  $\text{C}_6\text{D}_6$ ) monitoring the reaction of **9** with  $\text{HB}(\text{C}_6\text{F}_5)_2$

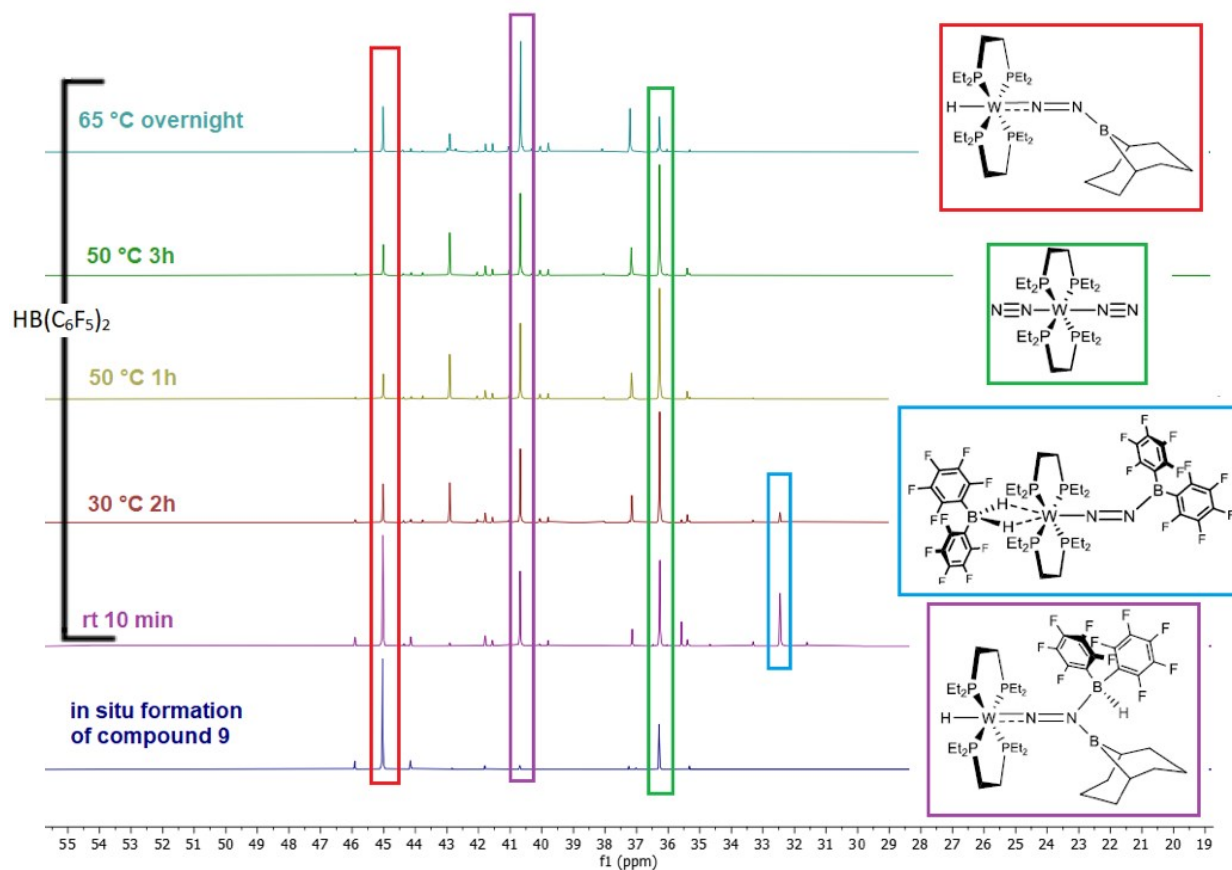

### 1.8. Reaction between compound **3** and 9-BBN

Compound **3** was formed *in-situ* and then 9-BBN was added. We monitored the reaction by NMR spectroscopy leading mainly to the formation of compound **10**.

**Figure S22.** Stacked  $^{31}\text{P}$  NMR spectra (162 MHz,  $\text{C}_6\text{D}_6$ ) monitoring the reaction of **3** with 9-BBN

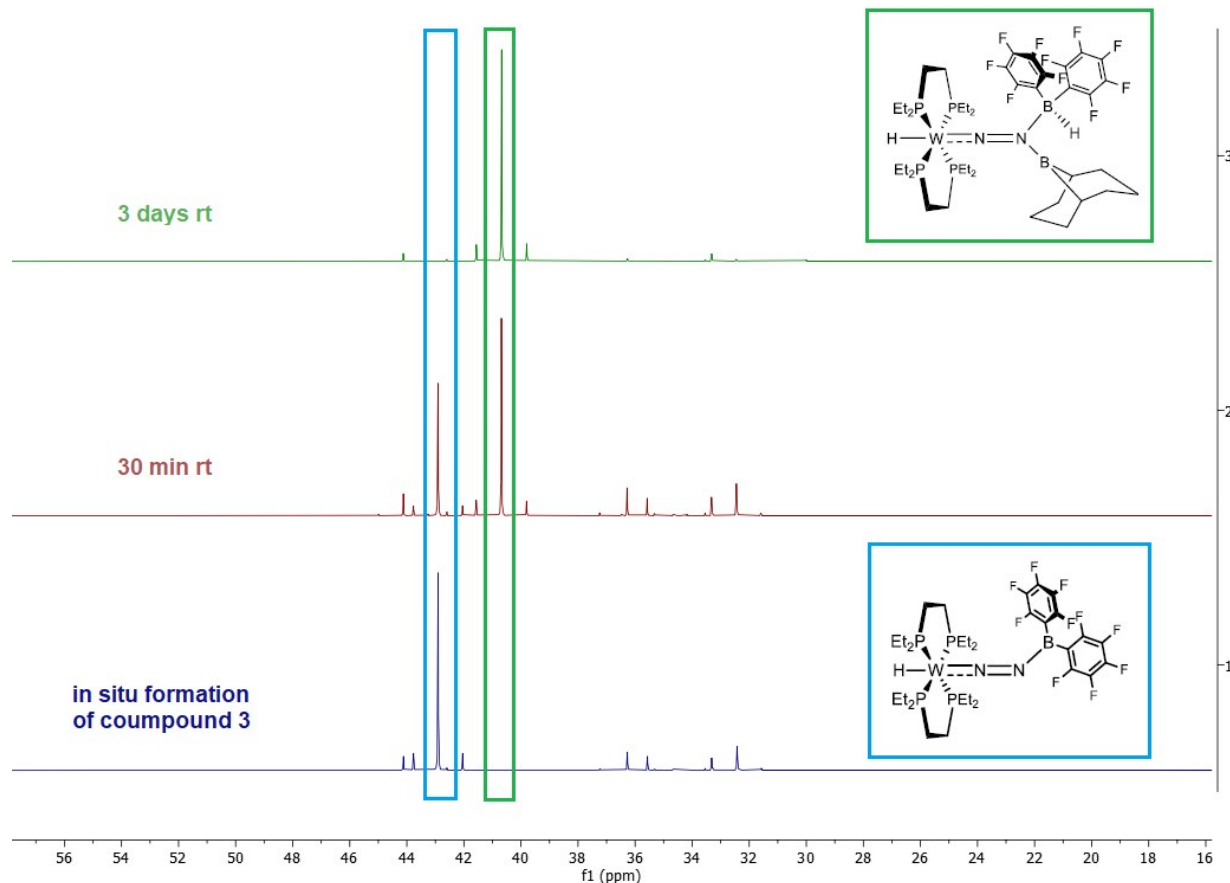

### 1.9. Reaction between compound **10** and Lewis bases

After formation of compound **10** *in-situ*, a drop (excess) of  $\text{PMe}_3$ ,  $\text{C}_5\text{H}_5\text{N}$  or TMEDA was added. After prolonged heating no reaction could be observed in any cases.

After formation of compound **10** *in-situ*, one equivalent of compound **2** was added and prolonged heating gave no reaction (only traces of compound **3** could be observed).



## 1.10. Reaction between 9-BBN and $\text{HB}(\text{C}_6\text{F}_5)_2$ (**1**)

In a glovebox, 9-BBN (2.6 mg, 21  $\mu\text{mol}$ , 1.0 equiv.) and  $\text{HB}(\text{C}_6\text{F}_5)_2$  (**1**, 0.8, 2.3  $\mu\text{mol}$ , 0.11 equiv.) were weighed in a 4-mL vial and solubilized in 0.5 mL of  $\text{C}_6\text{D}_6$ . The reaction was monitored by NMR spectroscopy and led to an equilibrated mixture between at least three compounds.

**Figure S23.** Stacked  $^{31}\text{P}$  NMR spectra (162 MHz,  $\text{C}_6\text{D}_6$ ) monitoring the reaction of  $\text{HB}(\text{C}_6\text{F}_5)_2$  with 9-BBN

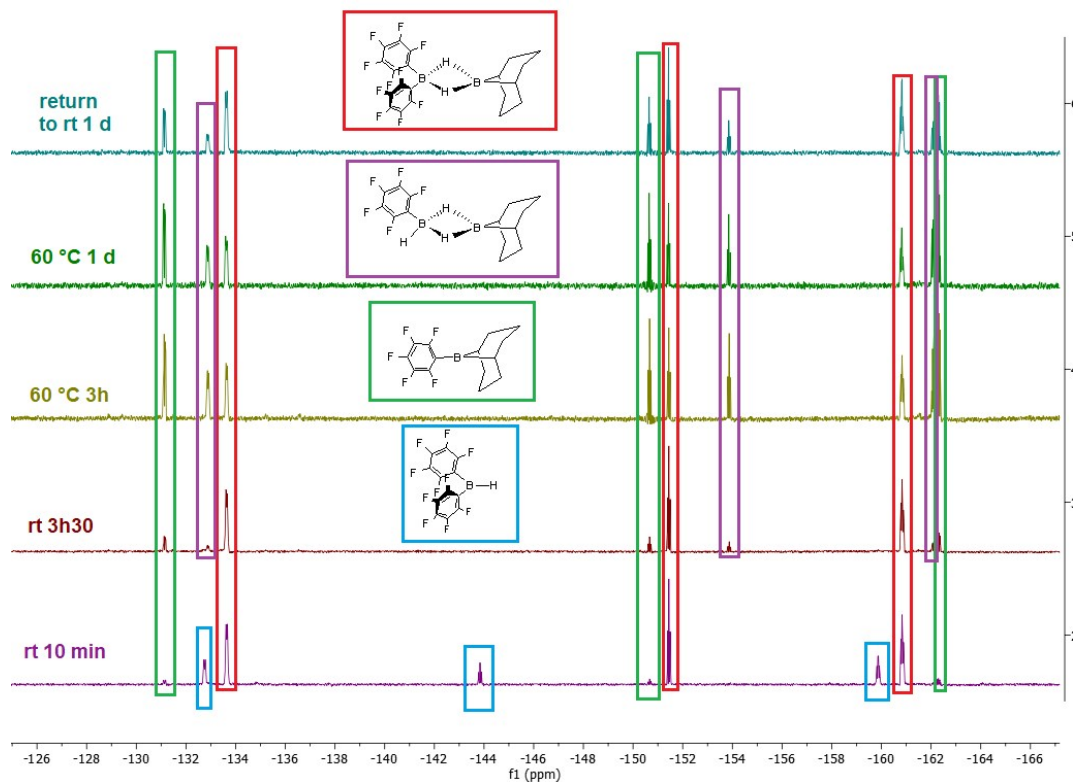

**Figure S24.**  $^{11}\text{B}$  NMR spectrum after cooling to RT for 1 day (128.4 MHz,  $\text{C}_6\text{D}_6$ ). Exponential apodization and multiple point baseline correction were applied.

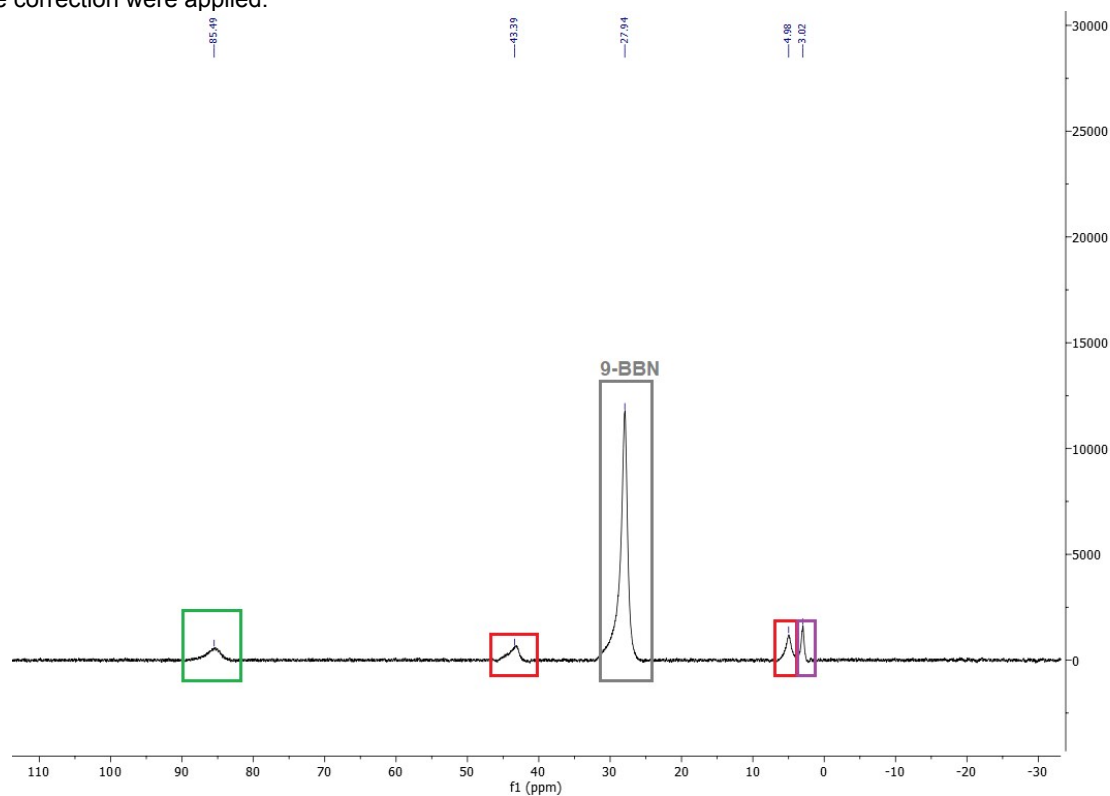

# 1.11. Compound 11

Figure S25.  $^1\text{H}$  NMR spectrum (400 MHz,  $\text{C}_6\text{D}_6$ )

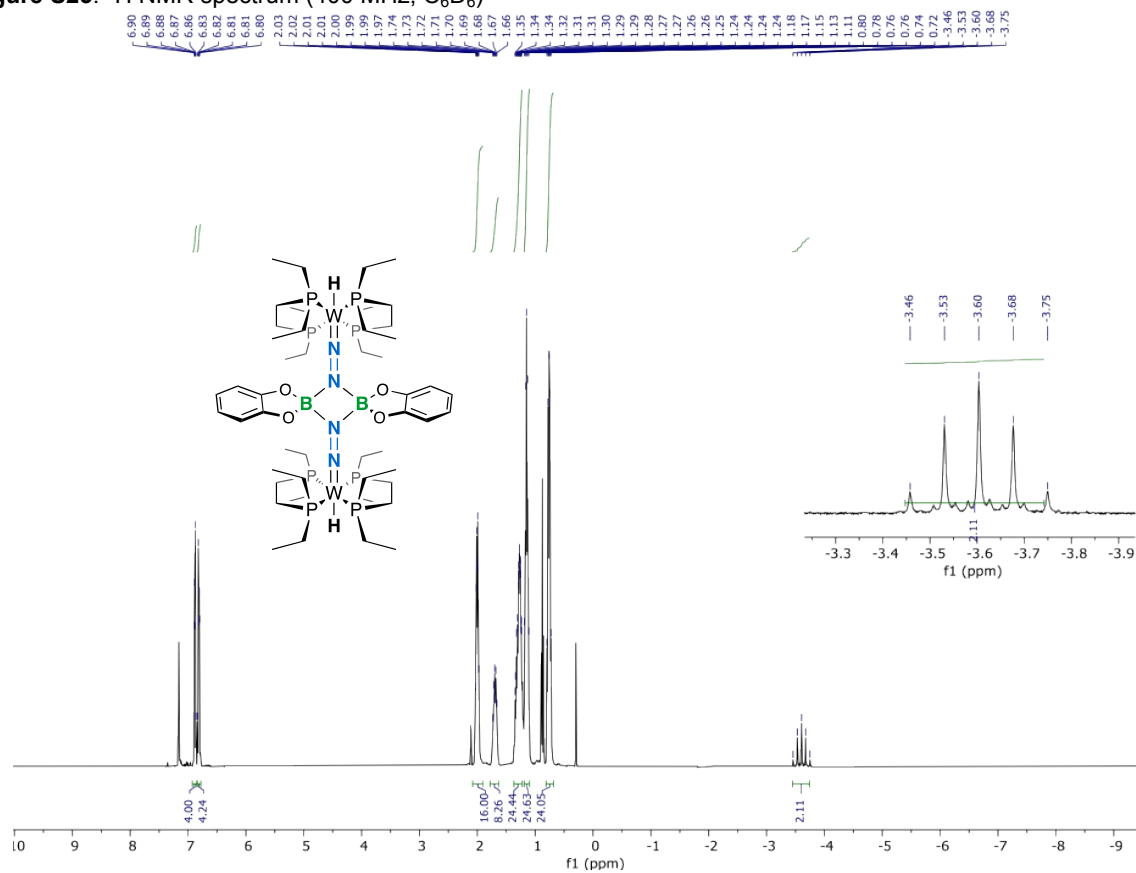

Figure S26.  $^{31}\text{P}\{^1\text{H}\}$  NMR spectrum (162 MHz,  $\text{C}_6\text{D}_6$ )

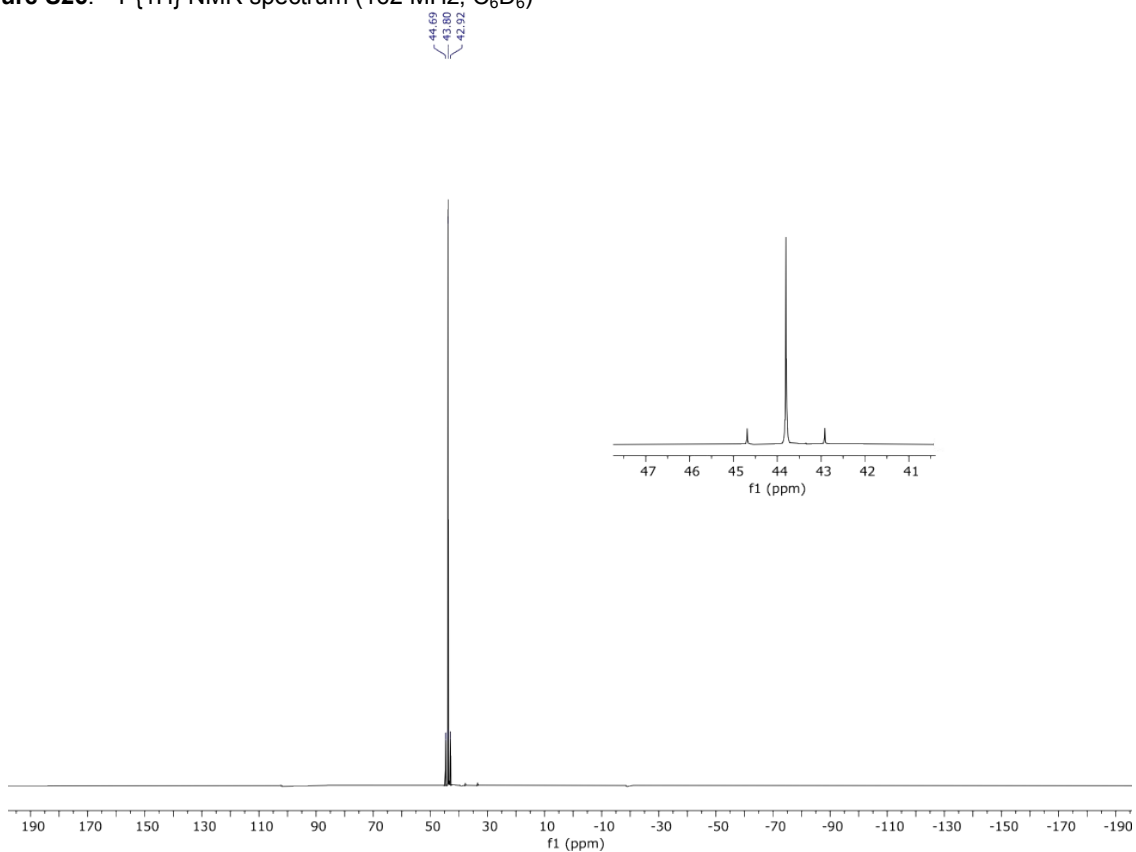

Figure S27.  $^{11}\text{B}$  NMR (128.4 MHz,  $\text{C}_6\text{D}_6$ )

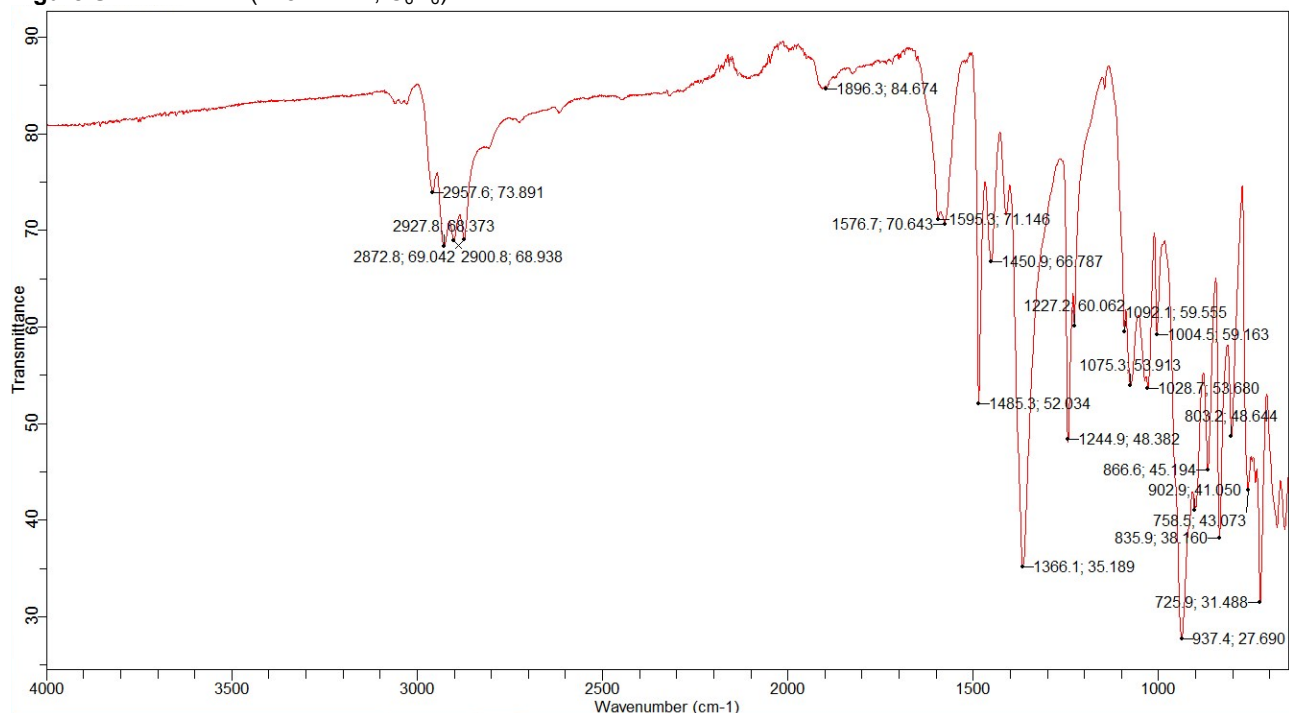

### 1.12. Formation of complex **9** with HBcat as a catalyst

In a glovebox, *trans*-[W(N<sub>2</sub>)<sub>2</sub>(depe)<sub>2</sub>] (**2**, 19.7 mg, 30 μmol, 1.0 equiv.), 9-BBN (3.8 mg, 30 μmol, 1.0 equiv.) and HBcat (0.5 μL of a 10% solution in C<sub>6</sub>D<sub>6</sub>, 2.3 μmol, 0.11 equiv.) were weighted in a 4-mL vial and dissolved in 0.5 mL of C<sub>6</sub>D<sub>6</sub>. The resulting solution was transferred to an NMR tube equipped with a J. Young valve and the reaction was monitored by NMR spectroscopy.

**Figure S28.** Stacked <sup>31</sup>P NMR (162 MHz, C<sub>6</sub>D<sub>6</sub>)

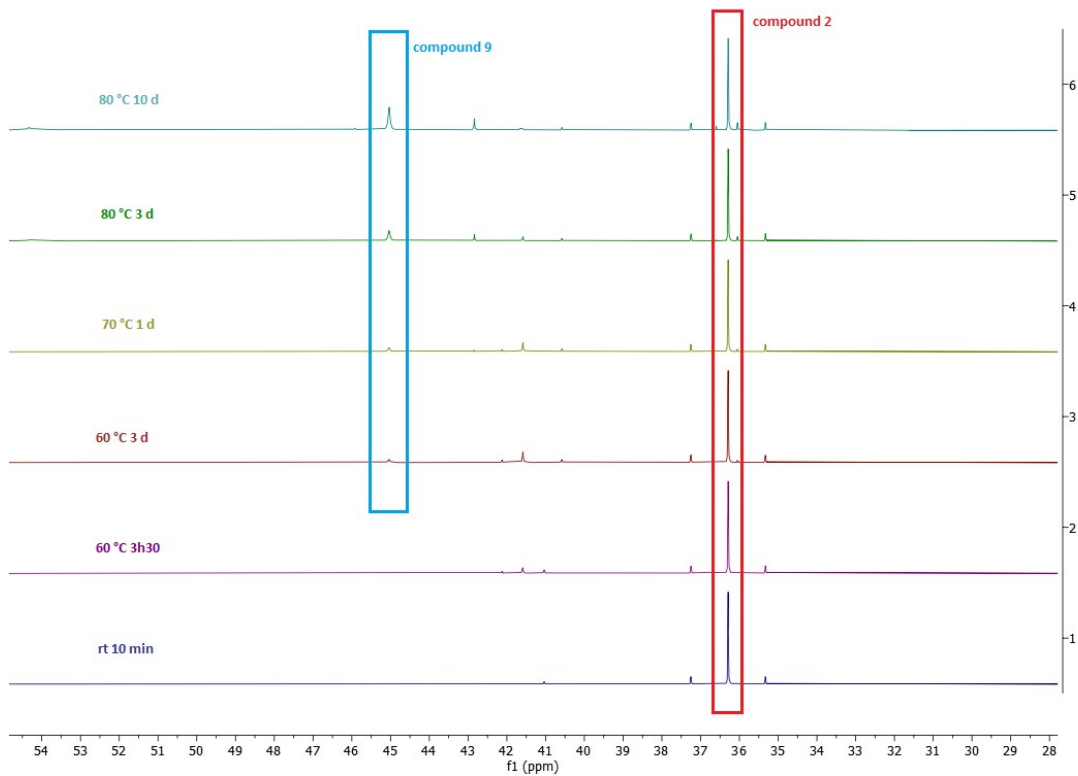

## 2. Crystallography

### 2.1. Data Collection and Refinement

Data for compounds **7**, **10** and **11** were collected at low temperature (100 K) on a Bruker Kappa Apex II diffractometer using a Mo-K $\alpha$  radiation ( $\lambda = 0.71073\text{\AA}$ ) micro-source and equipped with an Oxford Cryosystems Cryostream Cooler Device. The structures have been solved by Direct Methods and refined by means of least-squares procedures using the SHELXS97<sup>[S1]</sup> program included in the softwares package WinGX version 1.63<sup>[S2]</sup> or with the aid of the software package Crystal<sup>[S3]</sup>. The Atomic Scattering Factors were taken from International tables for X-Ray Crystallography<sup>[S4]</sup>. Hydrogen atoms bonding with boron and tungsten were anisotropically refined; all other hydrogen atoms were placed geometrically and refined using a riding model. All non-hydrogens atoms were anisotropically refined. Drawing of molecules in the following figures were performed with the program ORTEP32<sup>[S5]</sup> with 30% probability displacement ellipsoids for non-hydrogen atoms. The crystal structures have been deposited at the Cambridge Crystallographic Data Centre and allocated the deposition numbers **CCDC 2058894-2058896**.

## 2.2. X-ray Analysis of Compound 7 (CCDC 2058894)

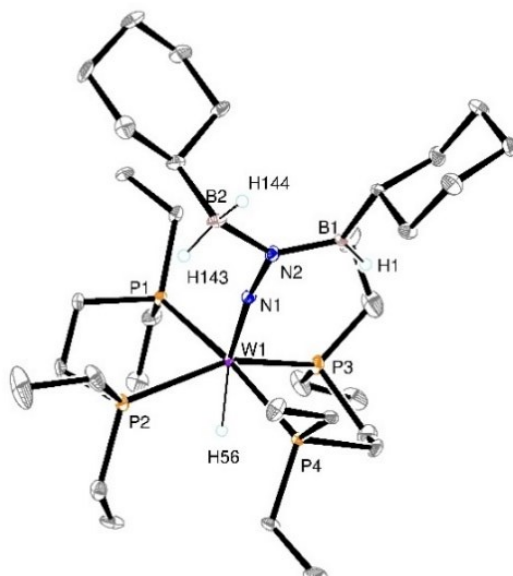

**Figure S29.** X-ray crystal structure of complex **7**, with ellipsoids set at the 30% probability level; hydrogen atoms omitted for clarity at the exception of those bound to heteroatoms.

**Table S1.** Crystallographic data for **7**.

|                                                                     |                                                                                |
|---------------------------------------------------------------------|--------------------------------------------------------------------------------|
| Chemical formula                                                    | C <sub>32</sub> H <sub>74</sub> B <sub>2</sub> N <sub>2</sub> P <sub>4</sub> W |
| Mr                                                                  | 816.32                                                                         |
| Crystal system, space group                                         | Monoclinic, P2 <sub>1</sub> /n                                                 |
| Temperature (K)                                                     | 100 K                                                                          |
| a, b, c (Å)                                                         | 12.04190 (2), 20.70460 (3), 15.84060 (3)                                       |
| α, β, γ (°)                                                         | 92.842 (3)                                                                     |
| V (Å <sup>3</sup> )                                                 | 3944.56 (2)                                                                    |
| Z                                                                   | 4                                                                              |
| Radiation type                                                      | Mo Kα radiation, λ = 0.71073 Å                                                 |
| μ (mm <sup>-1</sup> )                                               | 3.11                                                                           |
| Crystal size (mm)                                                   | 0.10 × 0.04 × 0.02                                                             |
| Data collection                                                     |                                                                                |
| Diffractometer                                                      | Bruker Kappa APEX II diffractometer                                            |
| Absorption correction                                               | multi-scan SADABS (Siemens, 1996)                                              |
| Tmin, Tmax                                                          | 0.84, 0.94                                                                     |
| No. of measured, independent and observed [ I  > 2σ(I)] reflections | 113933, 9696, 6634                                                             |
| Rint                                                                | 0.138                                                                          |
| θmax (°)                                                            | 28.3                                                                           |
| Refinement                                                          |                                                                                |
| R[F <sup>2</sup> > 2σ(F <sup>2</sup> )], wR(F <sup>2</sup> ), S     | 0.049, 0.024, 09.0                                                             |
| No. of reflections                                                  | 6630                                                                           |
| No. of parameters                                                   | 382                                                                            |
| H-atom treatment                                                    | H atoms treated by a mixture of independent and constrained refinement         |
| Δρmax, Δρmin (e Å <sup>-3</sup> )                                   | 4.80, -4.01                                                                    |

### 2.3. X-ray Analysis of Compound **10** (CCDC 2058896)

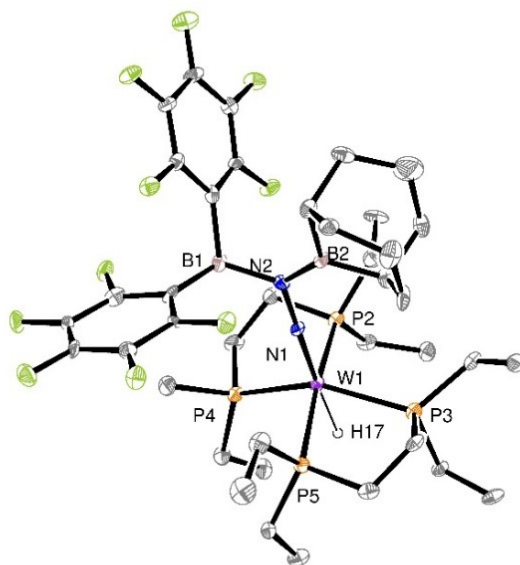

**Figure S30.** X-ray crystal structure of complex **10**, with ellipsoids set at the 30% probability level; hydrogen atoms omitted for clarity at the exception of those bound to heteroatoms.

**Table S2.** Crystallographic data for **10**.

|                                                                     |                                                                                                              |
|---------------------------------------------------------------------|--------------------------------------------------------------------------------------------------------------|
| Chemical formula                                                    | C <sub>87</sub> H <sub>136</sub> B <sub>4</sub> F <sub>20</sub> N <sub>4</sub> P <sub>8</sub> W <sub>2</sub> |
| Mr                                                                  | 2276.76                                                                                                      |
| Crystal system, space group                                         | Monoclinic, C2/c                                                                                             |
| Temperature (K)                                                     | 110 K                                                                                                        |
| a, b, c (Å)                                                         | 21.15760 (4), 19.95340 (4), 23.90660 (4)                                                                     |
| α, β, γ (°)                                                         | 106.795 (3)                                                                                                  |
| V (Å <sup>3</sup> )                                                 | 9662.06 (13)                                                                                                 |
| Z                                                                   | 4                                                                                                            |
| Radiation type                                                      | Mo Kα radiation, λ = 0.71073 Å                                                                               |
| μ (mm <sup>-1</sup> )                                               | 2.60                                                                                                         |
| Crystal size (mm)                                                   | 0.12 × 0.07 × 0.02                                                                                           |
| Data collection                                                     |                                                                                                              |
| Diffractometer                                                      | Bruker Kappa APEX II diffractometer                                                                          |
| Absorption correction                                               | multi-scan SADABS (Siemens, 1996)                                                                            |
| Tmin, Tmax                                                          | 0.71, 0.95                                                                                                   |
| No. of measured, independent and observed [ I  > 2σ(I)] reflections | 77544, 8550, 4245                                                                                            |
| Rint                                                                | 0.166                                                                                                        |
| θmax (°)                                                            | 25.1                                                                                                         |
| Refinement                                                          |                                                                                                              |
| R[F <sup>2</sup> > 2σ(F <sup>2</sup> )], wR(F <sup>2</sup> ), S     | 0.041, 0.041, 0.92                                                                                           |
| No. of reflections                                                  | 4240                                                                                                         |
| No. of parameters                                                   | 566                                                                                                          |
| H-atom treatment                                                    | H atoms parameters constrained                                                                               |
| Δpmax, Δpmin (e Å <sup>-3</sup> )                                   | 1.30 –1.88                                                                                                   |

## 2.4. X-ray Analysis of Compound **11** (CCDC 2058895)

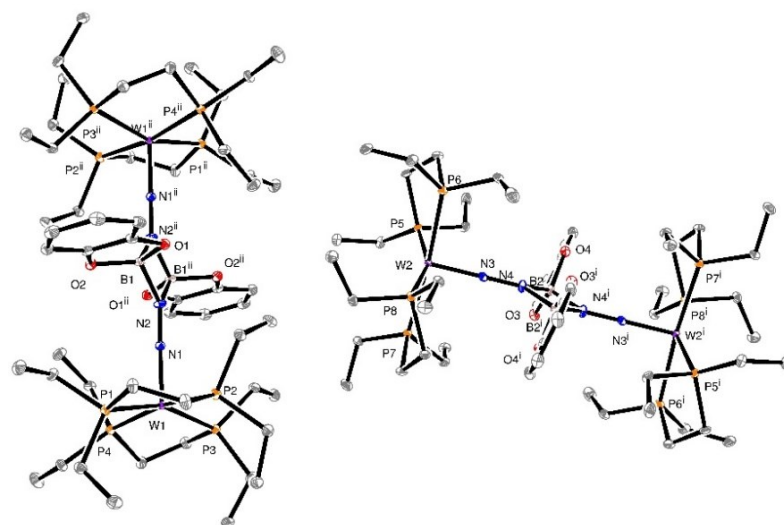

**Figure S31.** X-ray crystal structure of complex **11**, with ellipsoids set at the 30% probability level; hydrogen atoms omitted for clarity at the exception of those bound to heteroatoms.

**Table S3.** Crystallographic data for **11**.

|                                                                     |                                                                                                             |
|---------------------------------------------------------------------|-------------------------------------------------------------------------------------------------------------|
| Chemical formula                                                    | C <sub>52</sub> H <sub>106</sub> B <sub>2</sub> N <sub>4</sub> O <sub>4</sub> P <sub>8</sub> W <sub>2</sub> |
| Mr                                                                  | 1488.55                                                                                                     |
| Crystal system, space group                                         | Triclinic, P-1                                                                                              |
| Temperature (K)                                                     | 110 K                                                                                                       |
| a, b, c (Å)                                                         | 12.6243 (9), 15.7892 (11), 16.1110 (12)                                                                     |
| α, β, γ (°)                                                         | 91.132 (2), 91.227 (2), 92.249 (2)                                                                          |
| V (Å <sup>3</sup> )                                                 | 3207.5 (4)                                                                                                  |
| Z                                                                   | 2                                                                                                           |
| Radiation type                                                      | Mo Kα radiation, λ = 0.71073 Å                                                                              |
| μ (mm <sup>-1</sup> )                                               | 3.83                                                                                                        |
| Crystal size (mm)                                                   | 0.12 × 0.08 × 0.02                                                                                          |
| Data collection                                                     |                                                                                                             |
| Diffractometer                                                      | Bruker Kappa APEX II diffractometer                                                                         |
| Absorption correction                                               | multi-scan SADABS (Siemens, 1996)                                                                           |
| Tmin, Tmax                                                          | 0.77, 0.93                                                                                                  |
| No. of measured, independent and observed [ I  > 2σ(I)] reflections | 86276, 18961, 14292                                                                                         |
| Rint                                                                | 0.061                                                                                                       |
| θmax (°)                                                            | 30.2                                                                                                        |
| Refinement                                                          |                                                                                                             |
| R[F <sup>2</sup> > 2σ(F <sup>2</sup> )], wR(F <sup>2</sup> ), S     | 0.033, 0.032, 1.07                                                                                          |
| No. of reflections                                                  | 13329                                                                                                       |
| No. of parameters                                                   | 675                                                                                                         |
| H-atom treatment                                                    | H atoms treated by a mixture of independent and constrained refinement                                      |
| Δρmax, Δρmin (e Å <sup>-3</sup> )                                   | 1.56, -1.09                                                                                                 |



### 3. References

- [S1] SHELX97 [Includes SHELXS97, SHELXL97, CIFTAB] - Programs for Crystal Structure Analysis (Release 97-2). G. M. Sheldrick, Institut für Anorganische Chemie der Universität, Tammanstrasse 4, D-3400 Göttingen, Germany, 1998.
- [S2] L. J. Farrugia, *J. Appl. Crystallogr.* 1999, **32**, 837.
- [S3] CRYSTALS version 12: software for guided crystal structure analysis, P. W. Betteridge, J. R. Carruthers, R. I. Cooper, K. Prout and D. J. Watkin, *J. Appl. Cryst.* 2003, **36**, 1487.
- [S4] International Tables for X-Ray Crystallography Vol. IV, Kynoch press, Birmingham, England, 1974.
- [S5] L. J. Farrugia, *J. Appl. Crystallogr.* 1997, **30**, 565.
